# Supplementary material for: Magnetic resonance imaging of tumor-associated-macrophages (TAMs) with a nanoparticle contrast agent
Source: Royal Society of Chemistry journal article supplement (doi:10.1039/d1ra08061j), 2022-01-01
Supplement: d1ra08061j1.pdf [file d1ra08061j1.pdf]

*Supplementary information for*

**Magnetic Resonance Imaging of Tumor-Associated-Macrophages (TAMs) with a Nanoparticle**

**Contrast Agent**

Junhan Zhou<sup>1</sup>, Vijaykumar S. Meli<sup>2\*</sup>, Esther Yu-Tin Chen<sup>2\*</sup>, Rohan Kapre<sup>3,4</sup>, Raji Nagalla<sup>2</sup>, Wenwu

Xiao<sup>5,6</sup>, Alexander D. Borowsky<sup>6,7,8</sup>, Kit S. Lam<sup>5,6,9</sup>, Wendy F. Liu<sup>2</sup>, Angelique Y. Louie<sup>1,3</sup>

<sup>1</sup> Chemistry Graduate Group, University of California, Davis, CA, 95616, USA

<sup>2</sup> Department of Biomedical Engineering, University of California, Irvine, CA, 92697, USA

<sup>3</sup> Department of Biomedical Engineering, University of California, Davis, CA, 95616, USA

<sup>4</sup> Biostatistics Graduate Group, University of California, Davis, CA, 95616, USA

<sup>5</sup> Department of Biochemistry and Molecular Medicine, University of California, Davis, CA,

95616, USA

<sup>6</sup> Comprehensive Cancer Center, University of California, Davis, CA, 95616, USA

<sup>7</sup> Department of Pathology and Laboratory Medicine, University of California, Davis, CA, 95616,

USA

<sup>8</sup> Center for Immunology and Infectious Diseases, University of California, Davis, CA, 95616, USA

<sup>9</sup> Division of Hematology & Oncology, Department of Internal Medicine, University of California,

Davis, CA, 95616, USA

\* Contributed equally to this work

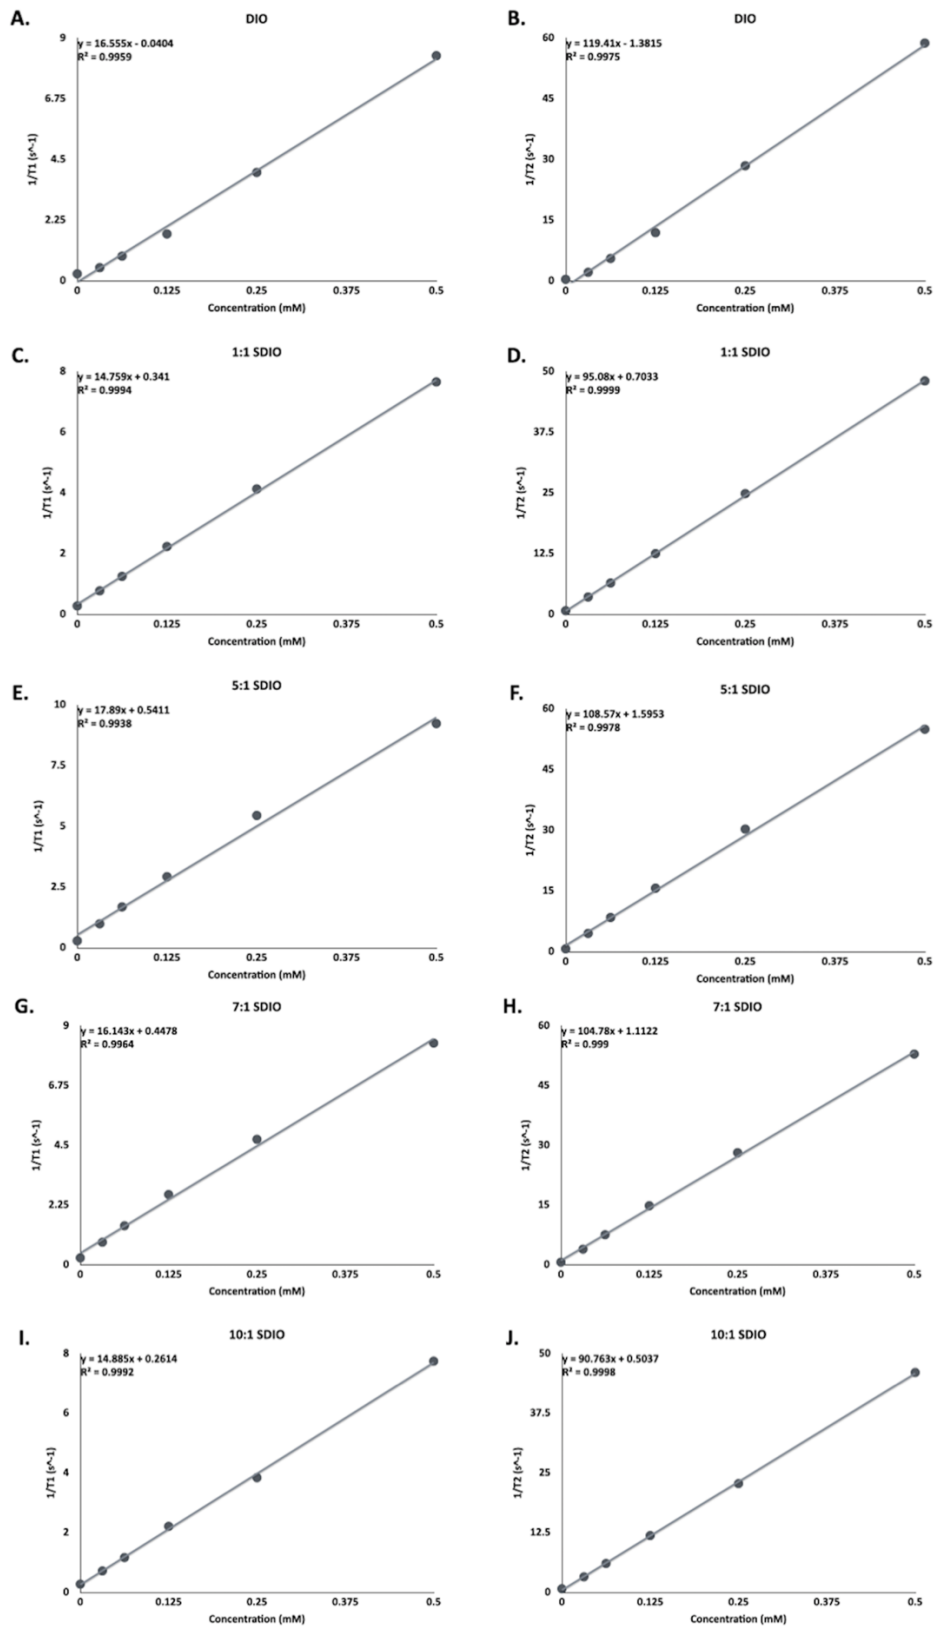

Figure S1. Longitudinal and transverse relaxivity plots at 1.4T for DIO (A and B), 1:1 SDIO (C and D), 5:1 SDIO (E and F), 7:1 SDIO (G and H) and 10:1 SDIO (I and J).

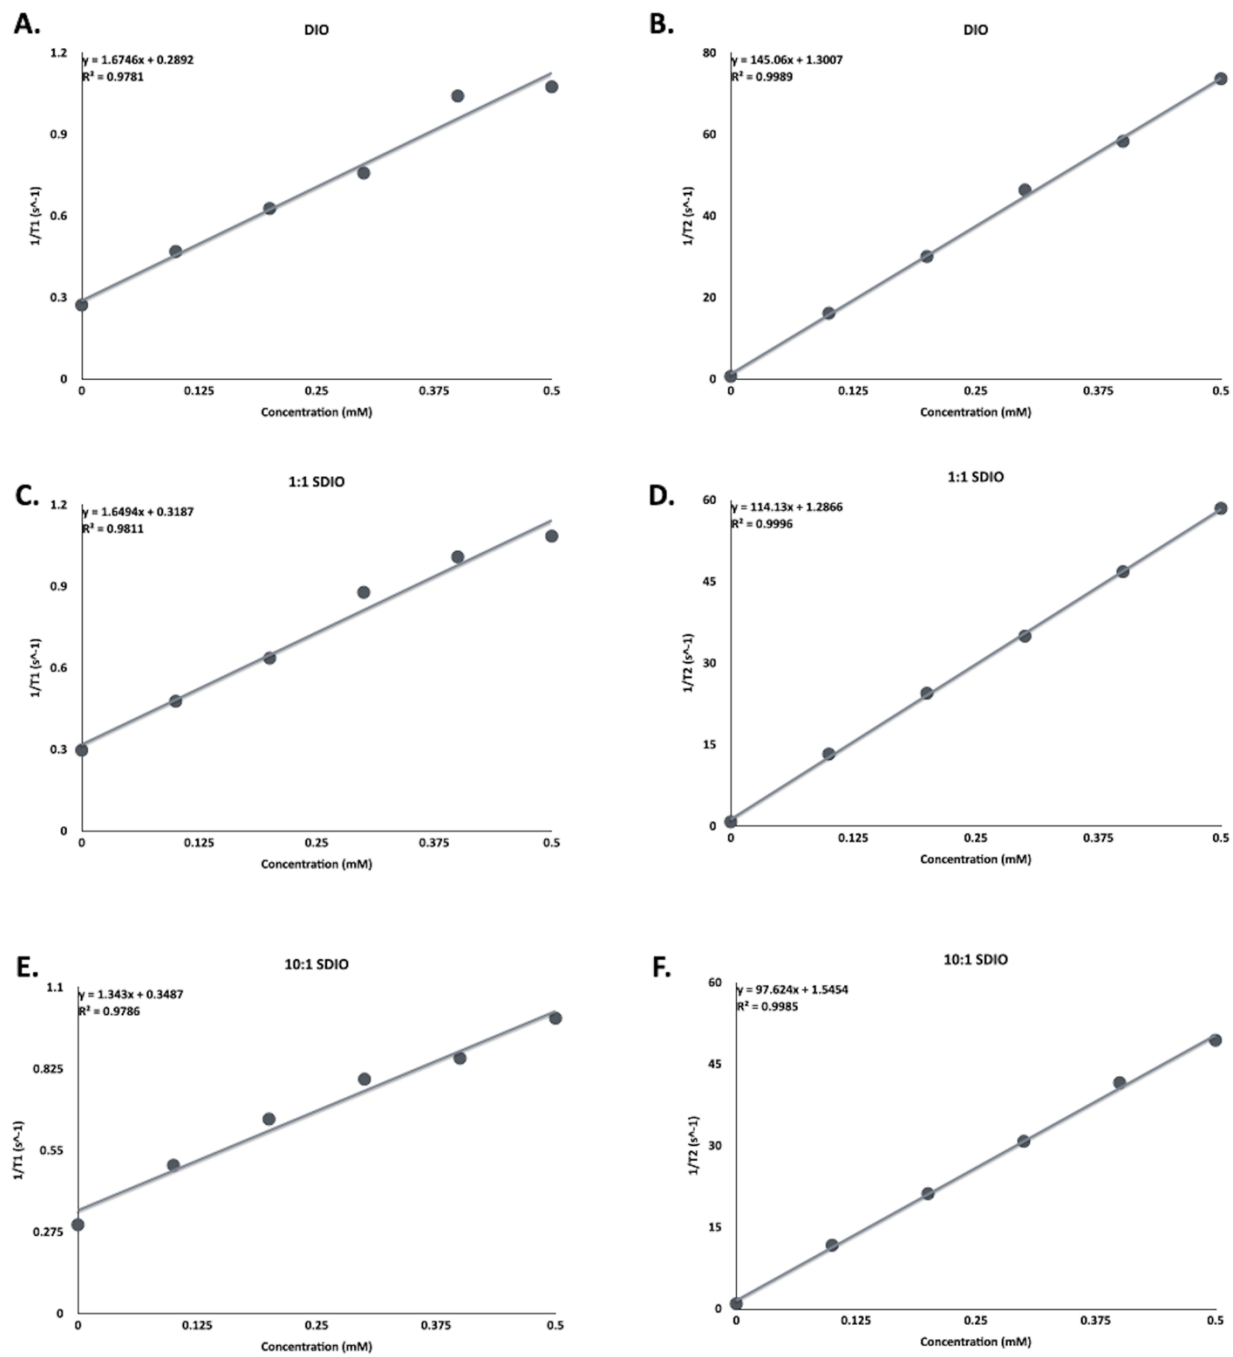

Figure S2. Longitudinal and transverse relaxivity plots at 7T for DIO (A and B), 1:1 SDIO (C and D), and 10:1 SDIO (E and F).

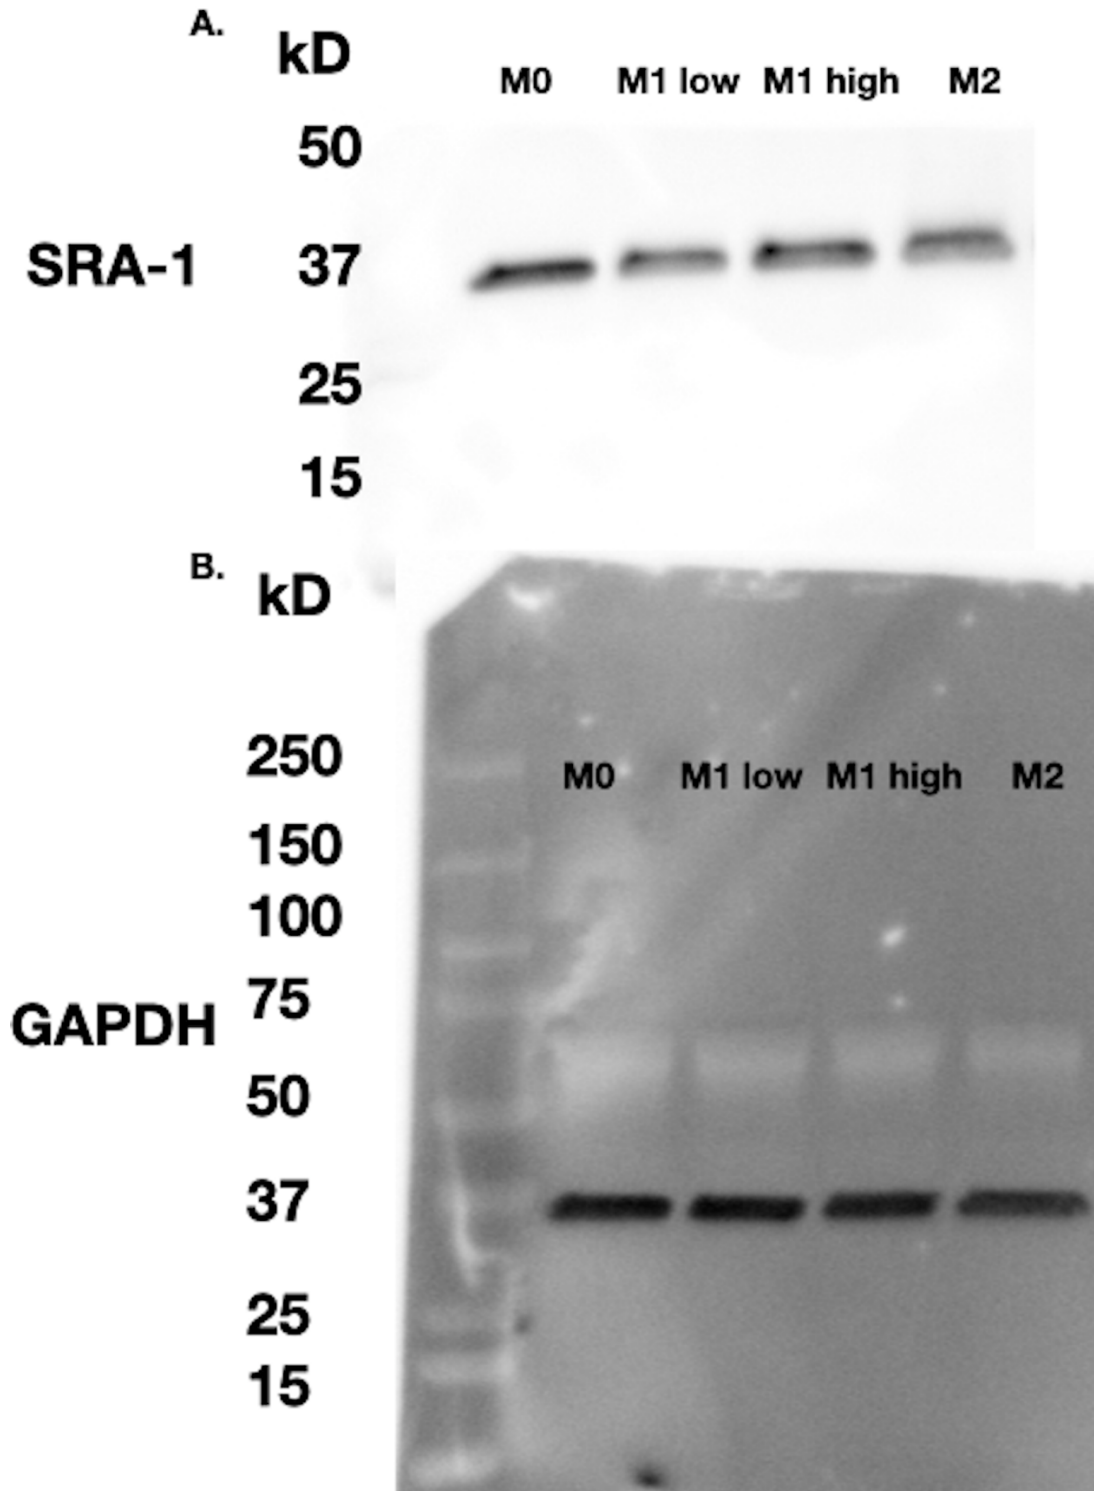

**Figure S3. Representative Immunoblot analysis of SRA-1 (A) and GAPDH (B) from bone marrow derived macrophages stimulated with the mentioned cytokines for 24 h. The sample landing was normalized using GAPDH, and SRA-1 and GAPDH were probed on different blots as they have similar molecular weights.**

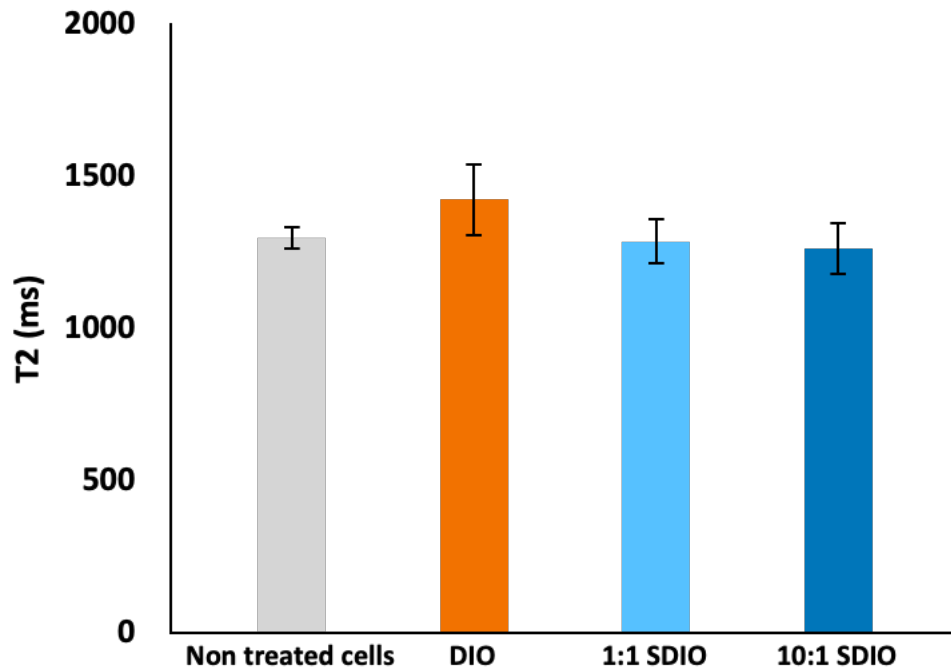

**Figure S4. 4T1 cell uptake study. Mean T2 values of 4T1 cells lysates.** No differences were found between 10:1 SDIO, 1:1 SDIO treated cells compared to untargeted DIO and untreated control ( $P=0.18, 0.89; 0.28, 0.89$ , respectively).

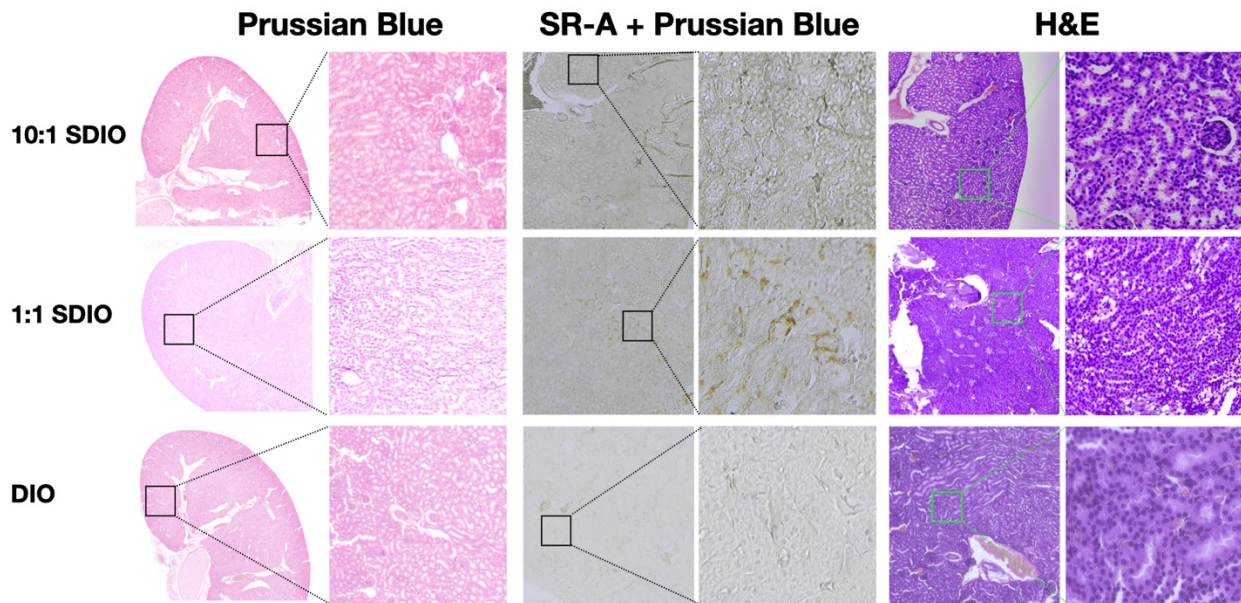

**Figure S5. Representative histology and immunohistochemistry images of mouse kidney.** Bright-field H&E, CD204, and Prussian Blue staining for iron after 48 hours post-injection MR imaging. No iron was found in kidney, and the H&E staining shows a normal kidney tissue morphology.

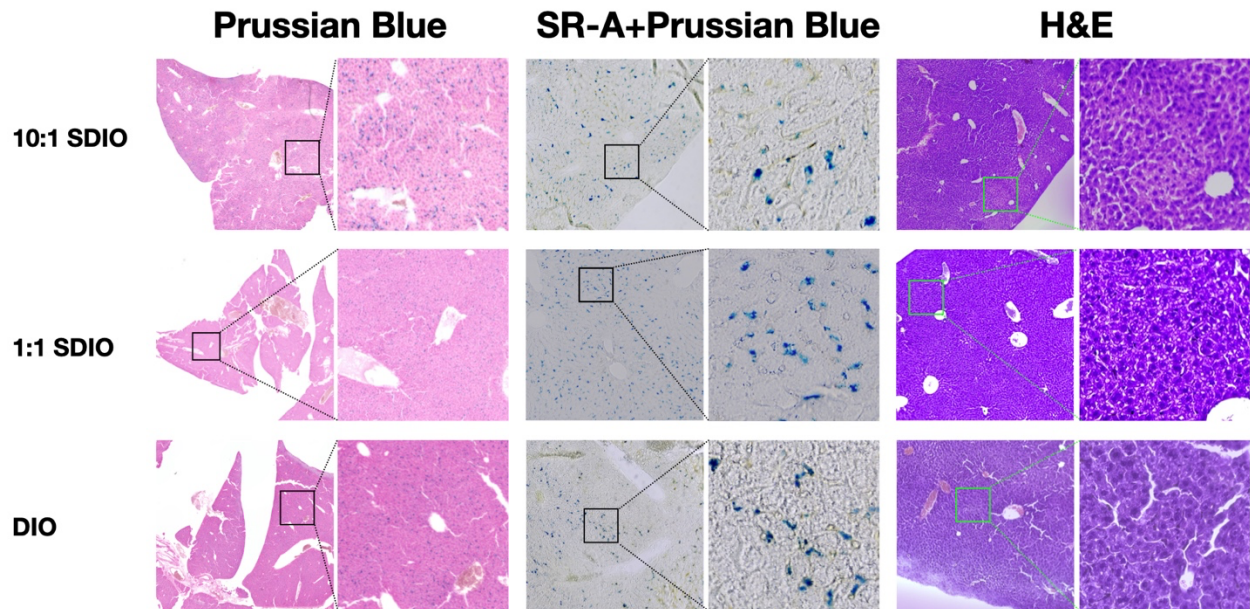

**Figure S6. Representative histology and immunohistochemistry images of mouse liver.** Bright-field H&E, CD204, and Prussian Blue staining for iron after 48 hours post-injection MR imaging. Iron was highly accumulated in liver, and the H&E staining shows a normal liver tissue morphology.
